# Supplementary material
Source: publisher figshare collection journal article supplement (https://acs.figshare.com/ndownloader/files/4049449)
Supplement: Supplementary file 1 [file 4049449]

data_jf2099fmi 

_audit_update_record
;
2011-12-15 # Formatted by publCIF
;
  
_audit_creation_method            SHELXL-97 
_chemical_name_systematic 
? 
_chemical_name_common             ? 
_chemical_melting_point           ? 
_chemical_formula_moiety          'C10 H17 O2, C F3 O3 S' 
_chemical_formula_sum 
 'C11 H17 F3 O5 S' 
_chemical_formula_weight          318.31 
  
loop_ 
 _atom_type_symbol 
 _atom_type_description 
 _atom_type_scat_dispersion_real 
 _atom_type_scat_dispersion_imag 
 _atom_type_scat_source 
 'C'  'C'   0.0033   0.0016 
 'International Tables Vol C Tables 4.2.6.8 and 6.1.1.4' 
 'H'  'H'   0.0000   0.0000 
 'International Tables Vol C Tables 4.2.6.8 and 6.1.1.4' 
 'O'  'O'   0.0106   0.0060 
 'International Tables Vol C Tables 4.2.6.8 and 6.1.1.4' 
 'F'  'F'   0.0171   0.0103 
 'International Tables Vol C Tables 4.2.6.8 and 6.1.1.4' 
 'S'  'S'   0.1246   0.1234 
 'International Tables Vol C Tables 4.2.6.8 and 6.1.1.4' 
  
_symmetry_cell_setting            monoclinic 
_symmetry_space_group_name_H-M    'P 21/c' 
_symmetry_space_group_name_Hall   '-P 2ybc'
  
loop_ 
 _symmetry_equiv_pos_as_xyz 
 'x, y, z' 
 '-x, y+1/2, -z+1/2' 
 '-x, -y, -z' 
 'x, -y-1/2, z-1/2' 
  
_cell_length_a                    10.6856(16) 
_cell_length_b                    9.2801(14) 
_cell_length_c                    13.1754(19) 
_cell_angle_alpha                 90.00 
_cell_angle_beta                  96.010(2) 
_cell_angle_gamma                 90.00 
_cell_volume                      1299.3(3) 
_cell_formula_units_Z             4 
_cell_measurement_temperature     90(2) 
_cell_measurement_reflns_used     5097 
_cell_measurement_theta_min       3.21 
_cell_measurement_theta_max       27.50 
  
_exptl_crystal_description        Plate 
_exptl_crystal_colour             Colourless 
_exptl_crystal_size_max           0.16 
_exptl_crystal_size_mid           0.11 
_exptl_crystal_size_min           0.02 
_exptl_crystal_density_meas       ? 
_exptl_crystal_density_diffrn     1.627 
_exptl_crystal_density_method     'not measured' 
_exptl_crystal_F_000              664 
_exptl_absorpt_coefficient_mu     0.304 
_exptl_absorpt_correction_type    multi-scan 
_exptl_absorpt_correction_T_min   0.9530 
_exptl_absorpt_correction_T_max   0.9940 
_exptl_absorpt_process_details    'SADABS 2008/1 (Sheldrick, 2008)' 
  
_exptl_special_details 
;
A colorless plate with approximate orthogonal dimensions 0.16 x 0.11 x 0.02mm3
was placed and optically centered on the Bruker SMART1000(1) CCD system at
-183C. The initial unit cell was indexed using a least-squares analysis of a
random set of reflections collected from three series of 0.3\% wide
omega-scans, 10 seconds per frame, and 30 frames per series that were well
distributed in reciprocal space. Four omega-scan data frame series were
collected [MoKa] with 0.3\% wide scans, 55 seconds per frame and 606 frames
collected per series at varying phi angles (phi=0\%, 90\%, 180\%, 270\%),
respectively. The crystal to detector distance was 5.54cm, thus providing a
complete sphere of data to 2thetamax=55.02\%.
; 
  
_diffrn_ambient_temperature       90(2) 
_diffrn_radiation_wavelength      0.71073 
_diffrn_radiation_type            MoK\a 
_diffrn_radiation_source          'fine-focus sealed tube' 
_diffrn_radiation_monochromator   graphite 
_diffrn_measurement_device_type   'Bruker SMART1000 CCD' 
_diffrn_measurement_method        '\f and \w scans' 
_diffrn_detector_area_resol_mean  ? 
_diffrn_reflns_number             10499 
_diffrn_reflns_av_R_equivalents   0.0448 
_diffrn_reflns_av_sigmaI/netI     0.0386 
_diffrn_reflns_limit_h_min        -13 
_diffrn_reflns_limit_h_max        13 
_diffrn_reflns_limit_k_min        -12 
_diffrn_reflns_limit_k_max        12 
_diffrn_reflns_limit_l_min        -16 
_diffrn_reflns_limit_l_max        16 
_diffrn_reflns_theta_min          2.91 
_diffrn_reflns_theta_max          27.50 
_reflns_number_total              2948 
_reflns_number_gt                 2223 
_reflns_threshold_expression      >2sigma(I) 
  
_computing_data_collection        'SMART (Version 5.054) (Bruker, 2002)' 
_computing_cell_refinement        'SAINT (7.68A) (Bruker, 2009)' 
_computing_data_reduction         'SAINT (7.68A) (Bruker, 2009)' 
_computing_structure_solution     'SHELXS-97 (Sheldrick, 2008)' 
_computing_structure_refinement   'SHELXL-97 (Sheldrick, 2008)' 
_computing_molecular_graphics     'Bruker SHELXTL' 
_computing_publication_material   'Bruker SHELXTL' 
  
_refine_special_details 
; 
 Refinement of F^2^ against ALL reflections.  The weighted R-factor wR and 
 goodness of fit S are based on F^2^, conventional R-factors R are based 
 on F, with F set to zero for negative F^2^. The threshold expression of 
 F^2^ > 2sigma(F^2^) is used only for calculating R-factors(gt) etc. and is 
 not relevant to the choice of reflections for refinement.  R-factors based 
 on F^2^ are statistically about twice as large as those based on F, and R- 
 factors based on ALL data will be even larger. 

Structural determination and Refinement:

All crystallographic calculations were performed on an iMac with 2.80GHz quad 
core processor and 8GB of extended memory. A total of 13892 reflections were 
collected and corrected for Lorentz and polarization effects in SAINT1 and 
absorption using Blessing's method as incorporated into the program 
SADABS(2,3,5) with 3141 unique. The SHELXTL(4) program package was implemented 
to determine the probable space group and set up the initial files. System 
symmetry, systematic absences and intensity statistics indicated the 
centrosymmetric monoclinic non-standard space group P21/c (no. 14). The 
structure was determined by direct methods with the successful location of a 
majority of the non-hydrogen atoms comprising the molecule using the program 
XS(5). The structure was refined with XL(5). The 13892 data collected were 
merged based upon identical indices yielding 10846 data [R(int)=0.0245] that 
were truncated to 2thetamax=55.00\% resulting in 10499 data that were further 
merged during least-squares refinement to 2948 unique data [R(int)=0.0448]. A 
single least-squares difference-Fourier cycle was required to locate the 
remaining non-hydrogen atoms.  All non-hydrogen atoms were refined 
anisotropically. Hydrogen atoms were initially idealized and then allowed to 
refine freely throughout the final convergence stage. The final structure was 
refined to convergence with R(F)=6.30%, wR(F2)=9.53%, GOF=1.105 for all 2948 
unique reflections [R(F)=4.03%, wR(F2)=8.60% for those 2223 data with Fo > 
4sigma(Fo)]. The final difference-Fourier map was featureless indicating that 
the structure is both correct and complete. An empirical correction for 
extinction was also determined to be 0.0026(6).

References:

1.	Bruker (2004) SMART (Version 5.054) and SAINT (Version 7.68a). Bruker 
AXS Inc., Madison, Wisconsin, USA.

2.	An Empirical Correction for Absorption Anisotropy, Blessing, R. H. 
(1995). Acta Cryst., A51, 33-38.

3.	Sheldrick, G.M., SADABS (2008/1), 'Siemens Area Detector Absorption 
Correction' Universitaet Goettingen: Goettingen, Germany.

4.	Sheldrick, G.M., (2002). SHELXTL. Version 6.1. Bruker AXS Inc., 
Madison, Wisconsin, USA.

5.	Sheldrick, G. M., (1997). SHELXS97 and SHELXL97. Universitaet 
Goettingen: Goettingen, Germany.


; 
  
_refine_ls_structure_factor_coef  Fsqd 
_refine_ls_matrix_type            full 
_refine_ls_weighting_scheme       calc 
_refine_ls_weighting_details 
 'calc w=1/[\s^2^(Fo^2^)+(0.0200P)^2^+1.9421P] where P=(Fo^2^+2Fc^2^)/3' 
_atom_sites_solution_primary      direct 
_atom_sites_solution_secondary    difmap 
_atom_sites_solution_hydrogens    geom 
_refine_ls_hydrogen_treatment     mixed 
_refine_ls_extinction_method      SHELXL 
_refine_ls_extinction_coef        0.0026(6) 
_refine_ls_extinction_expression 
 'Fc^*^=kFc[1+0.001xFc^2^\l^3^/sin(2\q)]^-1/4^' 
_refine_ls_number_reflns          2948 
_refine_ls_number_parameters      250 
_refine_ls_number_restraints      0 
_refine_ls_R_factor_all           0.0630 
_refine_ls_R_factor_gt            0.0403 
_refine_ls_wR_factor_ref          0.0953 
_refine_ls_wR_factor_gt           0.0860 
_refine_ls_goodness_of_fit_ref    1.105 
_refine_ls_restrained_S_all       1.105 
_refine_ls_shift/su_max           0.000 
_refine_ls_shift/su_mean          0.000 
  
loop_ 
 _atom_site_label 
 _atom_site_type_symbol 
 _atom_site_fract_x 
 _atom_site_fract_y 
 _atom_site_fract_z 
 _atom_site_U_iso_or_equiv 
 _atom_site_adp_type 
 _atom_site_occupancy 
 _atom_site_symmetry_multiplicity 
 _atom_site_calc_flag 
 _atom_site_refinement_flags 
 _atom_site_disorder_assembly 
 _atom_site_disorder_group 
C1 C 0.3625(2) 0.6637(3) 0.50905(17) 0.0176(5) Uani 1 1 d . . . 
O1 O 0.26615(15) 0.79803(17) 0.49056(12) 0.0162(3) Uani 1 1 d . . . 
C2 C 0.4299(2) 0.7044(3) 0.61188(18) 0.0200(5) Uani 1 1 d . . . 
H2A H 0.505(2) 0.766(3) 0.5971(19) 0.018(7) Uiso 1 1 d . . . 
H2B H 0.458(3) 0.616(3) 0.642(2) 0.031(8) Uiso 1 1 d . . . 
O2 O 0.42798(16) 0.65915(18) 0.42618(12) 0.0208(4) Uani 1 1 d . . . 
C3 C 0.3349(2) 0.7862(3) 0.66837(18) 0.0198(5) Uani 1 1 d . . . 
H3A H 0.276(2) 0.722(3) 0.6927(19) 0.018(7) Uiso 1 1 d . . . 
H3B H 0.380(3) 0.850(3) 0.728(2) 0.026(7) Uiso 1 1 d . . . 
C4 C 0.2637(2) 0.8821(3) 0.58843(18) 0.0188(5) Uani 1 1 d . . . 
H4 H 0.310(2) 0.967(3) 0.5746(19) 0.019(7) Uiso 1 1 d . . . 
C5 C 0.1246(2) 0.9035(3) 0.59627(19) 0.0207(5) Uani 1 1 d . . . 
H5A H 0.095(2) 0.988(3) 0.556(2) 0.022(7) Uiso 1 1 d . . . 
H5B H 0.110(2) 0.916(3) 0.665(2) 0.022(7) Uiso 1 1 d . . . 
C6 C 0.0641(2) 0.7664(3) 0.54812(19) 0.0193(5) Uani 1 1 d . . . 
H6A H 0.079(2) 0.687(3) 0.5922(19) 0.013(6) Uiso 1 1 d . . . 
H6B H -0.028(2) 0.777(3) 0.5309(18) 0.016(6) Uiso 1 1 d . . . 
C7 C 0.1350(2) 0.7417(3) 0.45585(18) 0.0181(5) Uani 1 1 d . . . 
H7 H 0.108(2) 0.801(3) 0.4022(18) 0.006(6) Uiso 1 1 d . . . 
C8 C 0.1602(2) 0.5873(3) 0.42713(19) 0.0212(5) Uani 1 1 d . . . 
H8A H 0.186(2) 0.584(3) 0.357(2) 0.018(6) Uiso 1 1 d . . . 
H8B H 0.086(3) 0.528(3) 0.428(2) 0.025(7) Uiso 1 1 d . . . 
C9 C 0.2706(2) 0.5400(3) 0.50349(19) 0.0210(5) Uani 1 1 d . . . 
H9A H 0.240(2) 0.523(3) 0.569(2) 0.021(7) Uiso 1 1 d . . . 
H9B H 0.311(2) 0.453(3) 0.480(2) 0.023(7) Uiso 1 1 d . . . 
C10 C 0.5111(3) 0.7783(3) 0.4101(2) 0.0236(5) Uani 1 1 d . . . 
H10A H 0.463(3) 0.868(3) 0.410(2) 0.023(7) Uiso 1 1 d . . . 
H10B H 0.543(3) 0.761(3) 0.348(2) 0.029(8) Uiso 1 1 d . . . 
H10C H 0.583(3) 0.783(3) 0.462(2) 0.028(7) Uiso 1 1 d . . . 
S11 S 0.75984(6) 0.91125(6) 0.69554(4) 0.01792(15) Uani 1 1 d . . . 
F11 F 0.72416(14) 0.63814(15) 0.73787(11) 0.0261(3) Uani 1 1 d . . . 
F12 F 0.91934(13) 0.69839(16) 0.73915(11) 0.0277(4) Uani 1 1 d . . . 
F13 F 0.81518(14) 0.76067(16) 0.86344(10) 0.0267(4) Uani 1 1 d . . . 
C11 C 0.8074(2) 0.7445(3) 0.76214(18) 0.0188(5) Uani 1 1 d . . . 
O11 O 0.75924(17) 0.87235(19) 0.58951(13) 0.0258(4) Uani 1 1 d . . . 
O12 O 0.85748(17) 1.01063(19) 0.73407(14) 0.0266(4) Uani 1 1 d . . . 
O13 O 0.63755(16) 0.93900(18) 0.72824(13) 0.0222(4) Uani 1 1 d . . . 
  
loop_ 
 _atom_site_aniso_label 
 _atom_site_aniso_U_11 
 _atom_site_aniso_U_22 
 _atom_site_aniso_U_33 
 _atom_site_aniso_U_23 
 _atom_site_aniso_U_13 
 _atom_site_aniso_U_12 
C1 0.0191(12) 0.0161(12) 0.0179(11) 0.0013(9) 0.0028(9) 0.0041(9) 
O1 0.0190(8) 0.0144(8) 0.0146(8) -0.0007(6) -0.0006(6) -0.0001(7) 
C2 0.0202(12) 0.0201(13) 0.0190(12) 0.0032(10) -0.0011(9) 0.0018(10) 
O2 0.0231(9) 0.0217(9) 0.0181(9) -0.0008(7) 0.0047(7) -0.0004(7) 
C3 0.0239(13) 0.0197(13) 0.0154(12) 0.0007(9) 0.0000(10) -0.0015(10) 
C4 0.0251(13) 0.0152(12) 0.0161(12) -0.0037(9) 0.0015(9) -0.0026(10) 
C5 0.0237(13) 0.0192(12) 0.0190(12) -0.0018(10) 0.0017(10) 0.0016(11) 
C6 0.0199(13) 0.0181(12) 0.0202(12) -0.0003(10) 0.0035(10) -0.0006(10) 
C7 0.0176(12) 0.0177(12) 0.0182(12) -0.0003(9) -0.0015(9) -0.0031(10) 
C8 0.0247(13) 0.0199(12) 0.0192(12) -0.0037(10) 0.0029(10) -0.0035(11) 
C9 0.0269(13) 0.0159(12) 0.0205(13) -0.0010(10) 0.0041(10) -0.0005(10) 
C10 0.0215(13) 0.0278(14) 0.0218(13) 0.0027(10) 0.0040(11) -0.0031(11) 
S11 0.0220(3) 0.0141(3) 0.0175(3) 0.0015(2) 0.0014(2) 0.0002(2) 
F11 0.0321(8) 0.0141(7) 0.0325(8) 0.0006(6) 0.0045(6) -0.0017(6) 
F12 0.0250(8) 0.0298(8) 0.0292(8) 0.0034(6) 0.0068(6) 0.0105(7) 
F13 0.0375(9) 0.0266(8) 0.0159(7) 0.0025(6) 0.0026(6) 0.0072(7) 
C11 0.0208(12) 0.0179(12) 0.0179(12) -0.0010(9) 0.0030(9) 0.0029(10) 
O11 0.0348(10) 0.0273(10) 0.0155(9) 0.0023(7) 0.0032(7) 0.0051(8) 
O12 0.0277(10) 0.0201(9) 0.0315(10) 0.0003(7) 0.0012(8) -0.0069(8) 
O13 0.0218(9) 0.0192(9) 0.0255(9) 0.0016(7) 0.0027(7) 0.0031(7) 
  
_geom_special_details 
; 
 All esds (except the esd in the dihedral angle between two l.s. planes) 
 are estimated using the full covariance matrix.  The cell esds are taken 
 into account individually in the estimation of esds in distances, angles 
 and torsion angles; correlations between esds in cell parameters are only 
 used when they are defined by crystal symmetry.  An approximate (isotropic) 
 treatment of cell esds is used for estimating esds involving l.s. planes. 
; 
  
loop_ 
 _geom_bond_atom_site_label_1 
 _geom_bond_atom_site_label_2 
 _geom_bond_distance 
 _geom_bond_site_symmetry_2 
 _geom_bond_publ_flag 
C1 O2 1.358(3) . ? 
C1 C9 1.508(3) . ? 
C1 C2 1.514(3) . ? 
C1 O1 1.619(3) . ? 
O1 C4 1.510(3) . ? 
O1 C7 1.521(3) . ? 
C2 C3 1.523(3) . ? 
C2 H2A 1.02(3) . ? 
C2 H2B 0.95(3) . ? 
O2 C10 1.448(3) . ? 
C3 C4 1.521(3) . ? 
C3 H3A 0.95(3) . ? 
C3 H3B 1.06(3) . ? 
C4 C5 1.514(3) . ? 
C4 H4 0.95(3) . ? 
C5 C6 1.534(3) . ? 
C5 H5A 0.98(3) . ? 
C5 H5B 0.94(3) . ? 
C6 C7 1.515(3) . ? 
C6 H6A 0.94(3) . ? 
C6 H6B 0.99(3) . ? 
C7 C8 1.513(3) . ? 
C7 H7 0.92(2) . ? 
C8 C9 1.532(3) . ? 
C8 H8A 0.99(3) . ? 
C8 H8B 0.96(3) . ? 
C9 H9A 0.97(3) . ? 
C9 H9B 0.98(3) . ? 
C10 H10A 0.98(3) . ? 
C10 H10B 0.93(3) . ? 
C10 H10C 0.98(3) . ? 
S11 O13 1.4414(18) . ? 
S11 O11 1.4422(18) . ? 
S11 O12 1.4443(18) . ? 
S11 C11 1.825(2) . ? 
F11 C11 1.345(3) . ? 
F12 C11 1.335(3) . ? 
F13 C11 1.337(3) . ? 
  
loop_ 
 _geom_angle_atom_site_label_1 
 _geom_angle_atom_site_label_2 
 _geom_angle_atom_site_label_3 
 _geom_angle 
 _geom_angle_site_symmetry_1 
 _geom_angle_site_symmetry_3 
 _geom_angle_publ_flag 
O2 C1 C9 109.0(2) . . ? 
O2 C1 C2 119.4(2) . . ? 
C9 C1 C2 118.7(2) . . ? 
O2 C1 O1 106.03(17) . . ? 
C9 C1 O1 100.25(17) . . ? 
C2 C1 O1 100.25(17) . . ? 
C4 O1 C7 109.68(16) . . ? 
C4 O1 C1 109.70(15) . . ? 
C7 O1 C1 109.39(16) . . ? 
C1 C2 C3 106.45(19) . . ? 
C1 C2 H2A 106.2(14) . . ? 
C3 C2 H2A 113.0(14) . . ? 
C1 C2 H2B 105.2(17) . . ? 
C3 C2 H2B 114.9(17) . . ? 
H2A C2 H2B 110(2) . . ? 
C1 O2 C10 118.01(19) . . ? 
C4 C3 C2 105.32(19) . . ? 
C4 C3 H3A 107.5(16) . . ? 
C2 C3 H3A 110.6(16) . . ? 
C4 C3 H3B 110.3(15) . . ? 
C2 C3 H3B 111.3(15) . . ? 
H3A C3 H3B 112(2) . . ? 
O1 C4 C5 103.36(18) . . ? 
O1 C4 C3 103.71(18) . . ? 
C5 C4 C3 117.0(2) . . ? 
O1 C4 H4 102.0(15) . . ? 
C5 C4 H4 115.7(15) . . ? 
C3 C4 H4 112.5(16) . . ? 
C4 C5 C6 103.7(2) . . ? 
C4 C5 H5A 109.4(15) . . ? 
C6 C5 H5A 109.6(16) . . ? 
C4 C5 H5B 109.9(16) . . ? 
C6 C5 H5B 113.4(17) . . ? 
H5A C5 H5B 111(2) . . ? 
C7 C6 C5 103.5(2) . . ? 
C7 C6 H6A 108.1(15) . . ? 
C5 C6 H6A 110.8(15) . . ? 
C7 C6 H6B 113.5(14) . . ? 
C5 C6 H6B 112.4(15) . . ? 
H6A C6 H6B 108(2) . . ? 
C6 C7 C8 117.4(2) . . ? 
C6 C7 O1 103.23(18) . . ? 
C8 C7 O1 102.59(18) . . ? 
C6 C7 H7 112.6(14) . . ? 
C8 C7 H7 115.2(14) . . ? 
O1 C7 H7 103.2(14) . . ? 
C7 C8 C9 104.6(2) . . ? 
C7 C8 H8A 109.7(15) . . ? 
C9 C8 H8A 109.4(15) . . ? 
C7 C8 H8B 111.6(16) . . ? 
C9 C8 H8B 114.2(16) . . ? 
H8A C8 H8B 107(2) . . ? 
C1 C9 C8 105.5(2) . . ? 
C1 C9 H9A 110.9(16) . . ? 
C8 C9 H9A 109.0(15) . . ? 
C1 C9 H9B 109.6(16) . . ? 
C8 C9 H9B 111.6(16) . . ? 
H9A C9 H9B 110(2) . . ? 
O2 C10 H10A 108.6(16) . . ? 
O2 C10 H10B 106.5(18) . . ? 
H10A C10 H10B 113(2) . . ? 
O2 C10 H10C 112.3(17) . . ? 
H10A C10 H10C 110(2) . . ? 
H10B C10 H10C 107(2) . . ? 
O13 S11 O11 114.97(11) . . ? 
O13 S11 O12 115.15(11) . . ? 
O11 S11 O12 115.47(11) . . ? 
O13 S11 C11 102.91(10) . . ? 
O11 S11 C11 103.08(11) . . ? 
O12 S11 C11 102.57(11) . . ? 
F12 C11 F13 107.40(19) . . ? 
F12 C11 F11 107.26(19) . . ? 
F13 C11 F11 106.86(19) . . ? 
F12 C11 S11 111.97(16) . . ? 
F13 C11 S11 111.72(16) . . ? 
F11 C11 S11 111.35(16) . . ? 
  
loop_ 
 _geom_torsion_atom_site_label_1 
 _geom_torsion_atom_site_label_2 
 _geom_torsion_atom_site_label_3 
 _geom_torsion_atom_site_label_4 
 _geom_torsion 
 _geom_torsion_site_symmetry_1 
 _geom_torsion_site_symmetry_2 
 _geom_torsion_site_symmetry_3 
 _geom_torsion_site_symmetry_4 
 _geom_torsion_publ_flag 
O2 C1 O1 C4 -137.42(18) . . . . ? 
C9 C1 O1 C4 109.25(19) . . . . ? 
C2 C1 O1 C4 -12.6(2) . . . . ? 
O2 C1 O1 C7 102.23(19) . . . . ? 
C9 C1 O1 C7 -11.1(2) . . . . ? 
C2 C1 O1 C7 -132.96(18) . . . . ? 
O2 C1 C2 C3 146.3(2) . . . . ? 
C9 C1 C2 C3 -76.5(3) . . . . ? 
O1 C1 C2 C3 31.2(2) . . . . ? 
C9 C1 O2 C10 172.8(2) . . . . ? 
C2 C1 O2 C10 -46.3(3) . . . . ? 
O1 C1 O2 C10 65.7(2) . . . . ? 
C1 C2 C3 C4 -40.3(3) . . . . ? 
C7 O1 C4 C5 -13.0(2) . . . . ? 
C1 O1 C4 C5 -133.16(18) . . . . ? 
C7 O1 C4 C3 109.5(2) . . . . ? 
C1 O1 C4 C3 -10.6(2) . . . . ? 
C2 C3 C4 O1 30.2(2) . . . . ? 
C2 C3 C4 C5 143.2(2) . . . . ? 
O1 C4 C5 C6 33.0(2) . . . . ? 
C3 C4 C5 C6 -80.2(2) . . . . ? 
C4 C5 C6 C7 -41.6(2) . . . . ? 
C5 C6 C7 C8 144.5(2) . . . . ? 
C5 C6 C7 O1 32.6(2) . . . . ? 
C4 O1 C7 C6 -12.4(2) . . . . ? 
C1 O1 C7 C6 107.96(19) . . . . ? 
C4 O1 C7 C8 -134.92(18) . . . . ? 
C1 O1 C7 C8 -14.6(2) . . . . ? 
C6 C7 C8 C9 -77.6(3) . . . . ? 
O1 C7 C8 C9 34.8(2) . . . . ? 
O2 C1 C9 C8 -78.6(2) . . . . ? 
C2 C1 C9 C8 140.2(2) . . . . ? 
O1 C1 C9 C8 32.4(2) . . . . ? 
C7 C8 C9 C1 -44.3(2) . . . . ? 
O13 S11 C11 F12 178.39(16) . . . . ? 
O11 S11 C11 F12 58.53(19) . . . . ? 
O12 S11 C11 F12 -61.75(18) . . . . ? 
O13 S11 C11 F13 -61.09(19) . . . . ? 
O11 S11 C11 F13 179.05(17) . . . . ? 
O12 S11 C11 F13 58.77(19) . . . . ? 
O13 S11 C11 F11 58.31(18) . . . . ? 
O11 S11 C11 F11 -61.55(18) . . . . ? 
O12 S11 C11 F11 178.17(16) . . . . ? 
  
_diffrn_measured_fraction_theta_max    0.991 
_diffrn_reflns_theta_full              27.50 
_diffrn_measured_fraction_theta_full   0.991 
_refine_diff_density_max    0.339 
_refine_diff_density_min   -0.379 
_refine_diff_density_rms    0.065 


_iucr_refine_instructions_details
;

TITL JF2099Fmi in P2(1)/c  FINAL ALL DATA MERGE-I 13DEC2011
CELL 0.71073  10.6856   9.2801  13.1754  90.000  96.010  90.000
ZERR    4.00   0.0016   0.0014   0.0019   0.000   0.002   0.000
LATT 1
SYMM -X, 1/2+Y, 1/2-Z
SFAC C  H  O  F  S
UNIT 44  68  20  12  4
SIZE 0.02 0.11 0.16  ! COLORLESS OVAL PLATE
OMIT -3 55.00
OMIT  -2   1   6 !   250.76     45.78  11.48   0.041   2.05
OMIT  -5   1   6 !   210.21     16.39   9.83   0.025   1.59
 
L.S. 9
ACTA
BOND $H
FMAP 2
PLAN 20
HTAB
WPDB -2
CONF
TEMP -183
WGHT    0.020000    1.942100
EXTI    0.002604
FVAR       0.19561
C1    1    0.362510    0.663699    0.509045    11.00000    0.01906    0.01612 =
         0.01786    0.00128    0.00280    0.00409
O1    3    0.266147    0.798034    0.490564    11.00000    0.01898    0.01436 =
         0.01463   -0.00067   -0.00060   -0.00014
C2    1    0.429868    0.704355    0.611884    11.00000    0.02016    0.02013 =
         0.01902    0.00324   -0.00107    0.00181
REM AFIX 23
H2A   2    0.505195    0.766078    0.597103    11.00000    0.01820
H2B   2    0.457761    0.615806    0.642443    11.00000    0.03138
REM AFIX 0
O2    3    0.427984    0.659150    0.426182    11.00000    0.02309    0.02165 =
         0.01808   -0.00080    0.00474   -0.00037
C3    1    0.334939    0.786231    0.668370    11.00000    0.02393    0.01967 =
         0.01545    0.00067    0.00003   -0.00146
REM AFIX 23
H3A   2    0.275890    0.721884    0.692729    11.00000    0.01789
H3B   2    0.380459    0.849706    0.728076    11.00000    0.02629
REM AFIX 0
C4    1    0.263707    0.882107    0.588435    11.00000    0.02509    0.01521 =
         0.01609   -0.00368    0.00149   -0.00258
REM AFIX 13
H4    2    0.309692    0.966735    0.574617    11.00000    0.01935
REM AFIX 0
C5    1    0.124590    0.903538    0.596266    11.00000    0.02369    0.01922 =
         0.01904   -0.00184    0.00171    0.00163
REM AFIX 23
H5A   2    0.094898    0.987589    0.555619    11.00000    0.02192
H5B   2    0.110284    0.916263    0.665251    11.00000    0.02211
REM AFIX 0
C6    1    0.064113    0.766377    0.548117    11.00000    0.01995    0.01815 =
         0.02022   -0.00026    0.00349   -0.00057
REM AFIX 23
H6A   2    0.079143    0.687392    0.592210    11.00000    0.01293
H6B   2   -0.028312    0.776511    0.530896    11.00000    0.01600
REM AFIX 0
C7    1    0.134963    0.741674    0.455850    11.00000    0.01758    0.01775 =
         0.01825   -0.00034   -0.00149   -0.00306
REM AFIX 13
H7    2    0.108093    0.801046    0.402241    11.00000    0.00639
REM AFIX 0
C8    1    0.160212    0.587277    0.427125    11.00000    0.02465    0.01994 =
         0.01921   -0.00371    0.00288   -0.00352
REM AFIX 23
H8A   2    0.185919    0.583837    0.357339    11.00000    0.01849
H8B   2    0.086144    0.528346    0.427675    11.00000    0.02536
REM AFIX 0
C9    1    0.270552    0.540008    0.503493    11.00000    0.02691    0.01588 =
         0.02055   -0.00098    0.00408   -0.00054
REM AFIX 23
H9A   2    0.240258    0.523332    0.568961    11.00000    0.02079
H9B   2    0.311056    0.453252    0.480471    11.00000    0.02290
REM AFIX 0
C10   1    0.511102    0.778348    0.410097    11.00000    0.02155    0.02775 =
         0.02180    0.00271    0.00398   -0.00308
REM AFIX 137
H10A  2    0.462921    0.868150    0.410305    11.00000    0.02299
H10B  2    0.543323    0.760931    0.347990    11.00000    0.02899
H10C  2    0.583353    0.782776    0.462340    11.00000    0.02790
REM AFIX 0
S11   5    0.759836    0.911252    0.695536    11.00000    0.02196    0.01412 =
         0.01752    0.00150    0.00137    0.00019
F11   4    0.724161    0.638141    0.737867    11.00000    0.03207    0.01409 =
         0.03250    0.00063    0.00449   -0.00172
F12   4    0.919342    0.698390    0.739155    11.00000    0.02496    0.02979 =
         0.02916    0.00343    0.00679    0.01055
F13   4    0.815178    0.760672    0.863439    11.00000    0.03752    0.02662 =
         0.01588    0.00254    0.00264    0.00720
C11   1    0.807419    0.744530    0.762139    11.00000    0.02078    0.01791 =
         0.01793   -0.00102    0.00299    0.00292
O11   3    0.759240    0.872349    0.589512    11.00000    0.03482    0.02735 =
         0.01547    0.00225    0.00321    0.00510
O12   3    0.857483    1.010626    0.734072    11.00000    0.02773    0.02013 =
         0.03149    0.00032    0.00121   -0.00691
O13   3    0.637546    0.939005    0.728245    11.00000    0.02183    0.01915 =
         0.02551    0.00156    0.00270    0.00312
HKLF 4
 
REM  JF2099Fmi in P2(1)/c  FINAL ALL DATA MERGE-I 13DEC2011
REM R1 =  0.0403 for   2223 Fo > 4sig(Fo)  and  0.0630 for all   2948 data
REM    250 parameters refined using      0 restraints
 
END  
     
WGHT      0.0219      1.8123 
REM Highest difference peak  0.339,  deepest hole -0.379,  1-sigma level  0.065
Q1    1   0.7848  0.8248  0.7344  11.00000  0.05    0.34
Q2    1   0.3034  0.8324  0.6283  11.00000  0.05    0.29
Q3    1   0.7602  0.9173  0.5202  11.00000  0.05    0.28
Q4    1   0.3855  0.6860  0.5591  11.00000  0.05    0.26
Q5    1   0.1049  0.7494  0.5039  11.00000  0.05    0.26
Q6    1   0.1035  0.8186  0.5753  11.00000  0.05    0.26
Q7    1   0.2703  0.6783  0.7633  11.00000  0.05    0.25
Q8    1   0.1632  0.6659  0.4516  11.00000  0.05    0.25
Q9    1   0.3197  0.5960  0.5061  11.00000  0.05    0.25
Q10   1   0.9803  0.9934  0.7580  11.00000  0.05    0.24
Q11   1   0.7426  0.5965  0.8469  11.00000  0.05    0.23
Q12   1   0.1936  0.8857  0.5956  11.00000  0.05    0.23
Q13   1   0.2982  0.7908  0.4434  11.00000  0.05    0.22
Q14   1   0.2005  0.5654  0.4719  11.00000  0.05    0.22
Q15   1   0.4054  0.6645  0.4757  11.00000  0.05    0.22
Q16   1   0.3746  0.6011  0.3847  11.00000  0.05    0.22
Q17   1   0.8008  0.7424  0.5268  11.00000  0.05    0.22
Q18   1   0.8042  0.9757  0.7291  11.00000  0.05    0.21
Q19   1   0.5070  0.8025  0.2451  11.00000  0.05    0.21
Q20   1   0.6350  0.9075  0.6627  11.00000  0.05    0.21


;
